# Supplementary material for: Primary Gallbladder Neuroendocrine Tumors: Insights into a Rare Histology Using a Large National Database
Source: Springer Nature journal article supplement (doi:10.1245/s10434-019-07440-6), 2019-05-17
Supplement: MOESM1 [file 16732088]

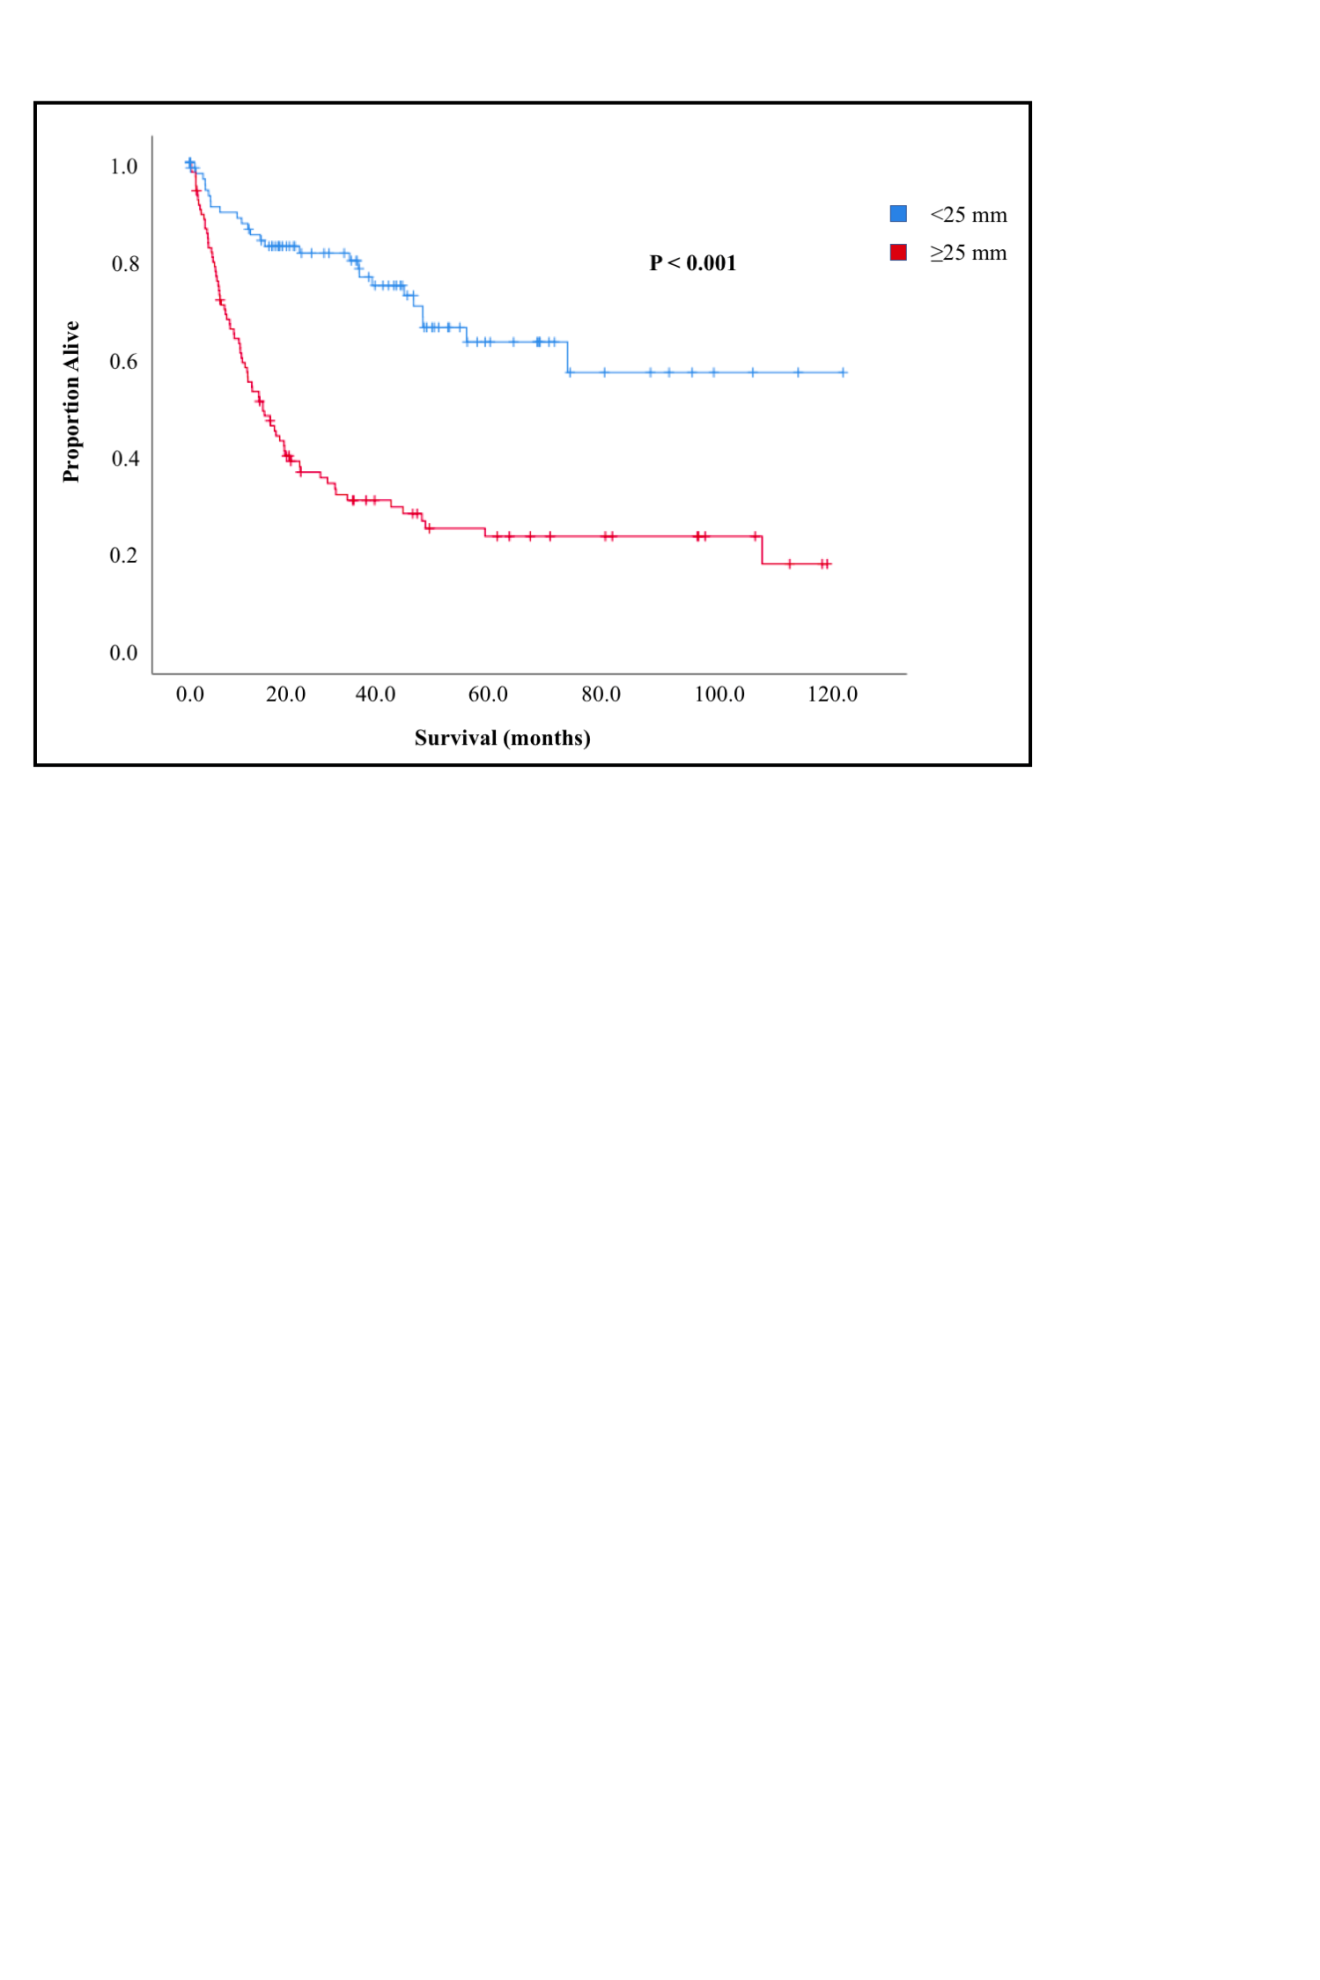


**Supplemental Figure 1**: Kaplan-Meier survival curves comparing patients with resected NETs <25 mm in diameter (N=114) to those ≥25 mm in diameter (N=113). Median OS for patients with tumors <25 mm in diameter was not reached. Median OS for patients with tumors ≥25 mm in diameter was 13 months (95% CI = 9-18 months).
